# Supplementary material
Source: ML conference proceedings conference paper supplement (https://proceedings.neurips.cc/paper_files/paper/2022/hash/96810b6d4752abe7bfb91f234c51e9e6-Abstract.html)
Supplement: Supplementary file 1 [file 96810b6d4752abe7bfb91f234c51e9e6-Supplemental-Conference.zip]

Archive with 2 entries (2 files):
- Hand_Object_Interaction_Image_Generation__NeurIPS_2022_Supp.pdf
- Video.mp4
